# 1 Hippocampal mechanisms support 2 cortisol-induced memory enhancements

3 **Brynn E. Sherman**<sup>1</sup>, **Bailey B. Harris**<sup>2</sup>, **Nicholas B. Turk-Browne**<sup>3,4</sup>, **Rajita Sinha**<sup>5</sup>, **Elizabeth**  
4 **V. Goldfarb**<sup>3,4,5</sup>

5 <sup>1</sup>Department of Psychology, University of Pennsylvania; <sup>2</sup>Department of Psychology, UCLA;  
6 <sup>3</sup>Department of Psychology, Yale University; <sup>4</sup>Wu Tsai Institute, Yale University; <sup>5</sup>Department of  
7 Psychiatry, Yale University

8 

---

9 **Abstract** Stress can powerfully influence episodic memory, often enhancing memory encoding for  
10 emotionally salient information. These stress-induced memory enhancements stand at odds with  
11 demonstrations that stress and the stress-related hormone cortisol can negatively affect the  
12 hippocampus, a brain region important for episodic memory encoding. To resolve this apparent conflict  
13 and determine whether and how the hippocampus supports memory encoding under cortisol, we  
14 combined behavioral assays of associative memory, high-resolution functional magnetic resonance  
15 imaging (fMRI), and pharmacological manipulation of cortisol in a within-participant, double-blinded  
16 procedure. Hydrocortisone led to enhanced functional connectivity between hippocampal subregions,  
17 which predicted subsequent memory enhancements for emotional information. Cortisol also modified  
18 the relationship between hippocampal representations and memory: whereas hippocampal signatures of  
19 distinctiveness predicted memory under placebo, relative integration predicted memory under cortisol.  
20 Together, these data provide novel evidence that the human hippocampus contains the necessary  
21 machinery to support emotional memory enhancements under stress.

22 **keywords:** emotional memory, associative memory, stress, cortisol, functional connectivity, pattern  
23 similarity

24 

---

## 25 Introduction

26 Our daily lives are filled with stressful events, from working up against a deadline to hearing that a loved  
27 one is ill. Such stressful events can transform the way we encode experiences into memory: Stress can im-  
28 pair memory for neutral, non-stress relevant information (e.g., a conversation with a friend while you were  
29 worrying about work), yet enhance memory for emotionally salient or stress-relevant experiences (e.g., a  
30 conversation with a family member about their illness) (*Joëls et al., 2006; McGaugh et al., 2015; Shields*  
31 *et al., 2017; Goldfarb, 2019*). Indeed, acute stress can powerfully enhance emotionally salient memories  
32 (*Payne et al., 2006, 2007; Smeets et al., 2007; Zoladz et al., 2011; Shields et al., 2022*) and elevated levels of  
33 stress-related hormones such as glucocorticoids are associated with enhanced emotional memory in both  
34 rodents (*Okuda et al., 2004; Roozendaal et al., 2006; Shors, 2006; Sandi and Pinelo-Nava, 2007*) and humans  
35 (*Buchanan and Lovallo, 2001; Abercrombie et al., 2003, 2006; Kuhlmann and Wolf, 2006; Schwabe et al.,*  
36 *2008; Segal et al., 2014*). However, pinpointing the neural mechanisms underlying this selective strengthen-  
37 ing of emotional memories under stress presents a puzzle.

38 Here we focus on the hippocampus, a key region for arbitrating stress effects on memory. The hip-  
39 pocampus plays a critical role in episodic memory by rapidly binding diverse elements of an experience  
40 into a detailed, holistic associative memory representation (*Davachi, 2006*). The hippocampus is also highly  
41 sensitive to stress, in part because of its high density of glucocorticoid receptors (*Seckl et al., 1991; Lupien*

42 *et al., 2007; Wang et al., 2013*). Such stress effects are often deleterious: In nonhuman animal models,  
43 glucocorticoids tend to impair hippocampal long-term potentiation (LTP), are associated with atrophy of  
44 hippocampal neurons, and have been linked to decreased hippocampal neurogenesis (*Kim and Diamond,*  
45 **2002**). In humans, direct administration of glucocorticoids via hydrocortisone reduces hippocampal BOLD  
46 activity (*Pruessner et al., 2008; Lovallo et al., 2010; Bini et al., 2022*). Accordingly, negative stress effects  
47 on the hippocampus have been instrumental in explaining stress-induced episodic memory impairments  
48 (*McEwen and Sapolsky, 1995; Kim and Diamond, 2002*). Yet, as discussed earlier, stress can also *enhance*  
49 memory, including promoting the very types of episodic memory that are thought to be supported by the  
50 hippocampus (*van Ast et al., 2014; Goldfarb et al., 2019*). How could stress enhance emotional episodic  
51 memories while impairing the function of the brain region important for episodic memory?

52 One possibility is that stress alters the underlying neural mechanisms of memory encoding, such that  
53 memories enhanced under stress rely on extrahippocampal mechanisms. For example, whereas the hip-  
54 pocampus often shows greater BOLD activity for subsequently remembered (versus forgotten) associations  
55 (*Davachi et al., 2003*), stress can attenuate (*Qin et al., 2012*) or reverse (*Henckens et al., 2009*) this effect.  
56 Stress also alters the electrophysiological signatures of memory encoding (*Meier et al., 2020*). Such findings  
57 have been taken as evidence that stress biases memory encoding away from the hippocampus and towards  
58 cortical regions, perhaps explaining why memories encoded under stress are less detailed, or more gist-like  
59 (*Qin et al., 2012; Pedraza et al., 2016*). Glucocorticoids and stress also broadly influence the neural systems  
60 that support memory (*Segal et al., 2010; Hermans et al., 2014; Goldfarb and Phelps, 2017; Schwabe et al.,*  
61 **2022**). Many emotional memory enhancements under stress have been explained by enhanced amygdala  
62 activity (*Roosendaal et al., 2009*), as well as hippocampal-amygdala interactions (*Roosendaal and McGaugh,*  
63 **1997; Kim et al., 2001; Ghosh et al., 2013; Vaisvaser et al., 2013; de Voogd et al., 2017**).

64 Another possibility is that stress acts directly on hippocampal learning pathways to enhance later mem-  
65 ory. Although we mentioned above that glucocorticoids can impair hippocampal LTP, there is also abun-  
66 dant and opposite evidence that they can enhance hippocampal LTP (*Rey et al., 1994; Pavlides et al., 1995;*  
67 *Krugers et al., 2005; Karst and Joëls, 2005; Karst et al., 2005; Vandael et al., 2021*). Such benefits are par-  
68 ticularly apparent when stress occurs at the time of synaptic stimulation (i.e., encoding) (*Joëls et al., 2006;*  
69 *Wiegert et al., 2006*). This facilitation is consistent with the role of the hippocampus in regulating stress re-  
70 sponses; if stress fully blocked hippocampal function, such regulation would be impossible (*Ulrich-Lai and*  
71 *Herman, 2009*). In humans, cortisol effects on hippocampal BOLD activity have been mixed (*Harrewijn et al.,*  
72 **2020**); in addition to findings of decreased activity, there is also evidence for increased hippocampal BOLD  
73 following hydrocortisone (*Symonds et al., 2012*). Additionally, during an acute stress provocation, higher  
74 cortisol responses tracked greater hippocampal BOLD increases (*Sinha et al., 2016*). Emotional memory  
75 enhancements under stress have also been linked to increased memory-related oscillations in the medial  
76 temporal lobe (*Heinbockel et al., 2021*). Together, these data suggest that there may be intra-hippocampal  
77 mechanisms to account for emotional memory enhancements with glucocorticoids.

78 Here we combine high-resolution fMRI, behavioral measures, and double-blind hydrocortisone admin-  
79 istration to probe the hippocampal mechanisms underlying memory encoding under cortisol. By using  
80 high-resolution fMRI, we embrace the heterogeneity of the hippocampus by examining responses and con-  
81 nectivity profiles of different subfields (e.g., CA1 and a combined CA2/3/dentate gyrus [DG] region). This is a  
82 critical advance as nonhuman animal findings demonstrate distinct stress effects across subfields (*Sharvit*  
83 *et al., 2015; Alkadhi, 2019*) and human research indicates that subfields support distinct aspects of mem-  
84 ory (*Schapiro et al., 2017; Duncan and Schlichting, 2018*), with CA3 and DG supporting the computations  
85 necessary for episodic memory (*Bakker et al., 2008; Molitor et al., 2021; Wanja et al., 2021; Wammes*  
86 *et al., 2022*). During the fMRI scan, participants encoded emotional and neutral object-scene associations;  
87 they then returned to the lab 24h later for memory tests (Figure 1). The emotional objects consisted of  
88 alcoholic beverages that generally have positive valence and have been used in prior studies (*Goldfarb*  
89 *et al., 2020*). Participants completed this procedure twice, once receiving 20mg hydrocortisone and once  
90 receiving placebo prior to encoding (double-blinded; order counter-balanced). By examining how cortisol  
91 influences behavioral measures of memory, neural signatures of encoding within the hippocampus, and  
92 brain-behavior relationships, we identify novel mechanisms by which glucocorticoids modulate hippocam-

93 pal function to enhance emotional memory.

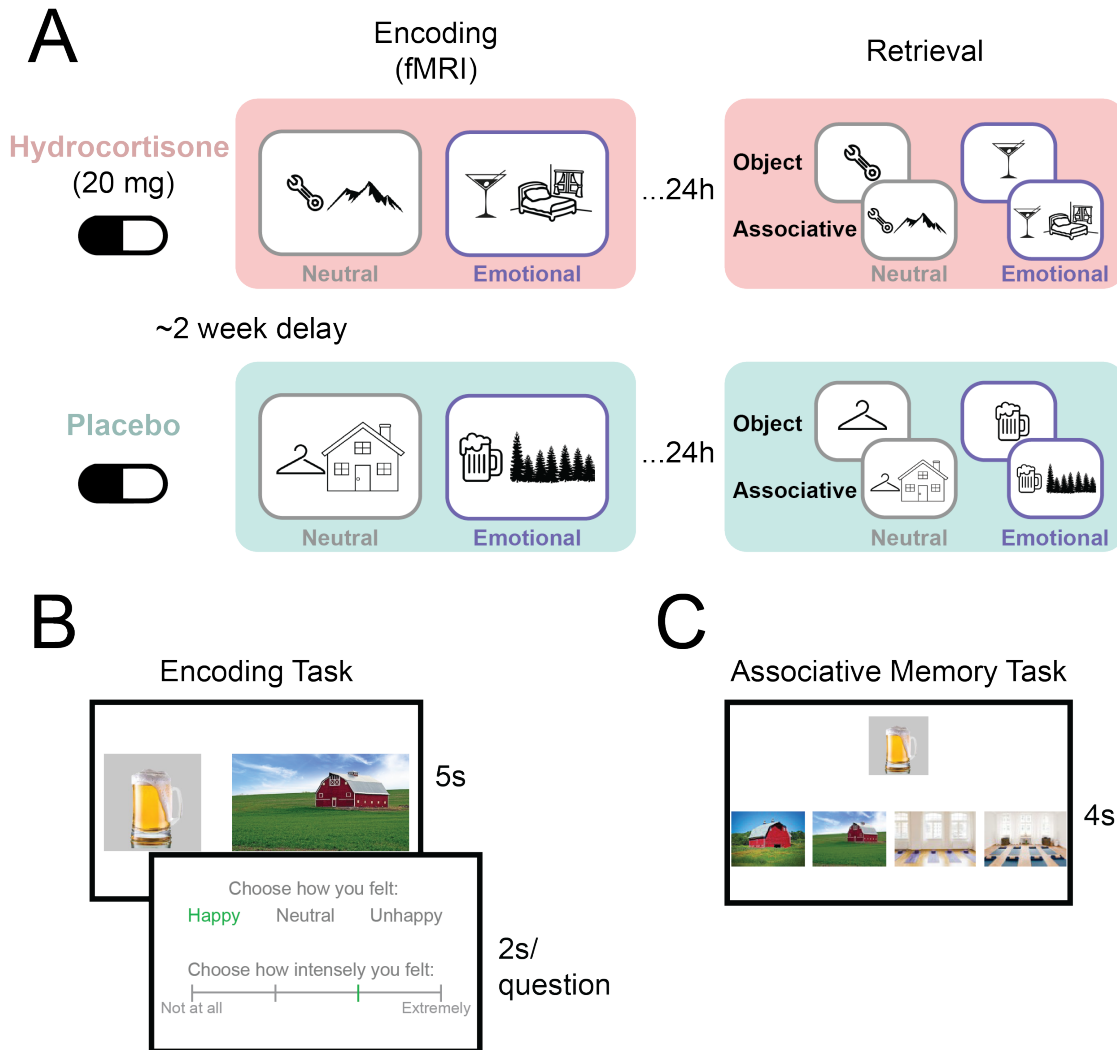

**Figure 1.** Task design. A) Participants completed the experimental procedure twice (on two separate weeks). They first received a pill containing either 20mg hydrocortisone or no active substance (placebo). They then completed a memory encoding task while undergoing fMRI. The encoding task consisted of two runs of encoding object-scene pair associations. Objects were either neutral (handheld objects) or emotionally salient (alcoholic beverages). Participants returned 24h later to be tested on their memory for individual objects and object-scene associations. B) During encoding, participants viewed an object-scene pair for 5s, during which they imagined the object and scene interacting. They then rated whether the imagined interaction made them feel happy, neutral, or unhappy (valence) and how intensely they felt that way (arousal). C) During the associative memory task, participants were shown an object and asked to identify its associated scene. The options included the correct scene, a perceptually matched lure scene, another scene (which had been encoded with a different object), and a perceptually matched lure for the incorrect scene. Choosing the correct scene denotes correct associative memory.

94 **Results**

95 **Hydrocortisone administration leads to elevated cortisol, but no detectable changes in**  
96 **affect or awareness**

97 To validate the hydrocortisone tablet administration, we collected salivary samples throughout the session  
98 (Supplemental Figure S1). Indeed, participants exhibited elevated salivary cortisol following drug, but not

99 placebo; drug-induced cortisol elevation was evident throughout encoding (pre- and post-encoding follow-  
100 ing hydrocortisone relative to placebo:  $p_s < 0.001$ ).

101 Despite this robust increase in peripheral cortisol, we did not observe significant changes in awareness  
102 or overall affect (PANAS, measured pre- and post-scan; *Watson et al., 1988*). Overall, participants were  
103 unaware of which pill they had received (immediately post-pill: 9.4% correct, 74% unsure; post-scan: 29%  
104 correct, 45% unsure). Furthermore, we found no significant changes in positive [ $F(1, 23) = 0.81, p = 0.38$ ] or  
105 negative [ $F(1, 23) = 1.39, p = 0.25$ ] affect.

### 106 **Hydrocortisone modulates subjective affect at encoding**

107 After pill administration, participants completed two runs of an associative memory encoding task while  
108 undergoing fMRI (Figure 1A, left). To examine effects of hydrocortisone on emotional memory, each run  
109 involved either emotionally salient or neutral trials. One run consisted of forming trial-unique associations  
110 between neutral, handheld household objects (e.g., a wrench) and neutral scenes; the other run consisted of  
111 associations between an emotionally salient, alcoholic beverages (e.g., a martini) and scenes (more details  
112 on stimuli in Methods: Task Stimuli). Participants were instructed to vividly imagine each object and scene  
113 interacting and then rate whether the imagined interaction was happy, neutral, or unhappy (valence rating)  
114 and how intensely they felt that way (arousal rating; Figure 1B).

115 Hydrocortisone did not influence arousal ratings,  $F(1, 75) = 0.37, p = 0.54$ . There was a main effect of  
116 trial type (emotionally salient vs. neutral) [ $F(1, 75) = 6.27, p = 0.015$ ], though this did not interact with pill  
117 [ $F(1, 75) = 0.64, p = 0.43$ ]. Thus, consistent with the stimulus design, participants rated emotionally salient  
118 associations as more arousing than the neutral associations (Figure 2A), and this was not modulated by  
119 hydrocortisone.

120 In contrast, hydrocortisone did modulate valence ratings (Figure 2B). There was a main effect of valence  
121 on ratings [ $F(2, 279) = 95.11, p < 0.001$ ], such that the majority of trials were rated as neutral. There was  
122 no main effect of stimulus type [ $F(1, 279) = 0.042, p = 0.84$ ], nor did trial type reliably interact with valence  
123 [ $F(2, 279) = 2.49, p = 0.085$ ]. Although there was no main effect of pill [ $F(1, 279) = 0.062, p = 0.80$ ], there was a  
124 valence by pill interaction [ $F(2, 279) = 3.53, p = 0.031$ ]. This interaction was driven by a smaller proportion of  
125 trials rated as “neutral” under hydrocortisone, relative to placebo ( $\beta = -0.082[SE = 0.036], t(279) = -2.28, p =$   
126  $0.023$ ). That is, hydrocortisone amplified emotional salience at encoding by shifting participants’ valence  
127 ratings away from neutral and towards feeling more positive or negative about the encoded associations.

### 128 **Hydrocortisone alters the relationship between arousal and memory encoding**

129 Participants were tested on their memory for encoded associations 24h later. On each trial, participants  
130 viewed an object and were asked to select which of four scenes was paired with the object at encoding  
131 (Figure 1C). Participants selected the correctly paired scene more often than chance (chance = 0.25; mean  
132 proportion correct = 0.36, SD = 0.094). Performance did not differ as a function of pill [ $F(1, 75) = 0.25, p =$   
133  $0.62$ ], though it did differ by trial type [ $F(1, 75) = 8.23, p = 0.0054$ ], with better memory for neutral associations  
134 (Figure 2C).

135 Prior work has demonstrated that subjective affect can modulate memory effects under cortisol (*Aber-*  
136 *crombie et al., 2003*). Thus, we examined whether memory was affected by subjective arousal differently  
137 under hydrocortisone vs. placebo. Indeed, arousal and pill interacted [ $F(1, 71) = 9.30, p = 0.0032$ ], such  
138 that participants with higher subjective arousal had better associative memory under hydrocortisone, but  
139 worse associative memory under placebo (Figure 2D). This difference was significant for both emotional  
140 [ $\beta = 0.080[0.40], t(71) = 2.01, p = 0.048$ ] and neutral [ $\beta = 0.095[0.038], t(71) = 2.48, p = 0.016$ ] trial types.

141 As hydrocortisone modulated valence ratings during encoding, we asked whether the shifts towards  
142 happy or unhappy judgments were related to later memory. Indeed, the change in subjective “happy”  
143 ratings predicted the change in associative memory from placebo to hydrocortisone across participants,  
144 [ $F(1, 23) = 6.22, p = 0.020$ ], with more “happy” ratings under hydrocortisone corresponding to better mem-  
145 ory (Figure 2E). This effect did not interact with trial type [ $F(1, 23) = 0.0070, p = 0.93$ ] and was specific to  
146 positive valence. That is, the change in “unhappy” ratings did not predict differences in memory for either  
147 trial type across participants [ $F(1, 23) = 0.36, p = 0.56$ ].

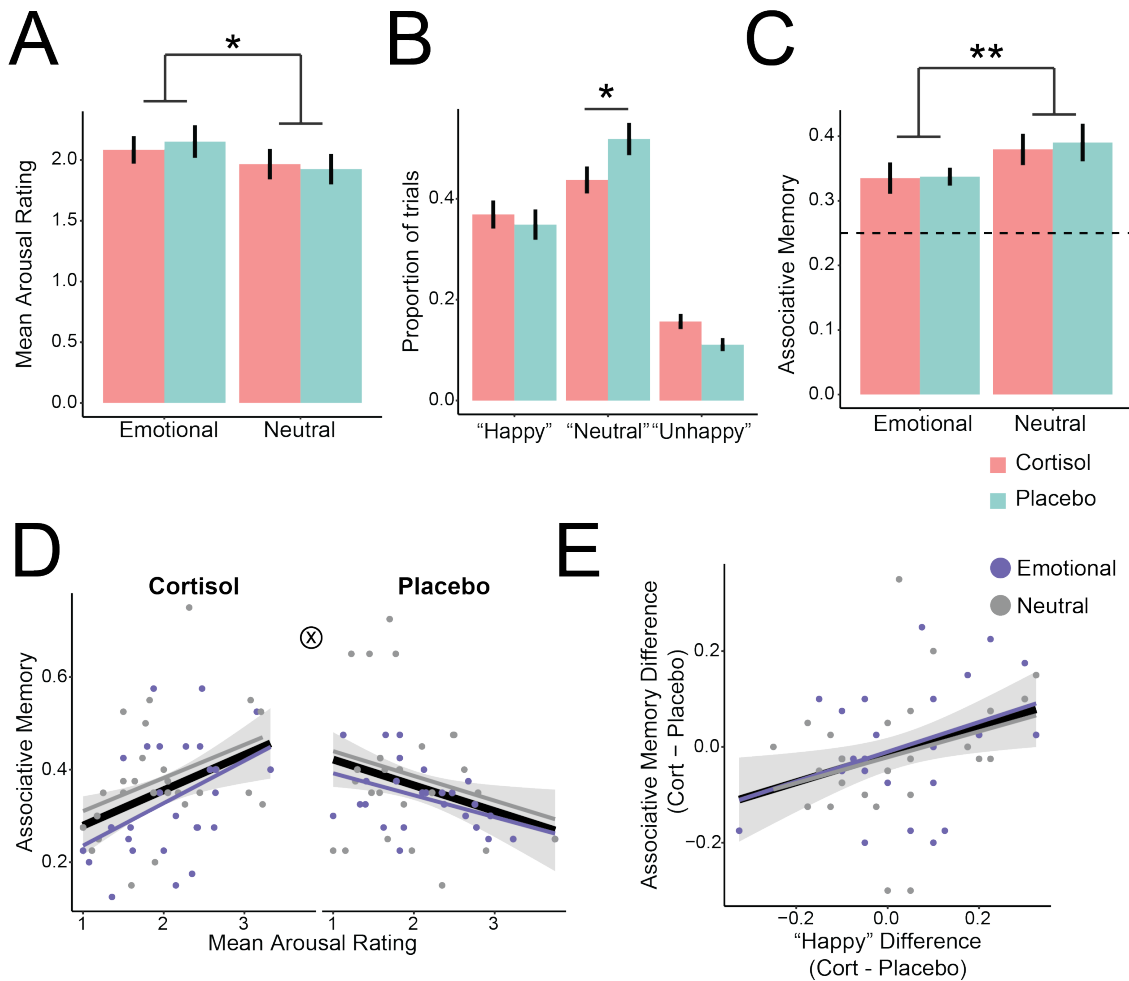

**Figure 2.** Behavioral Results. A) Participants rated emotionally salient associations as more arousing than neutral associations. B) Cortisol altered the valence of encoded associations, such that participants were less likely to endorse feeling “neutral” about the object-scene pair. C) Participants performed above chance (.25; dashed line) on the associative memory test, with better memory for neutral associations. D) Cortisol altered the relationship between arousal and memory. Participants with high subjective arousal had better associative memories under cortisol, but worse memories under placebo. E) The cortisol-induced change in happiness ratings predicted associative memory, such that participants with greater increases in happiness had better memory. A-C: Error bars denote standard error of the mean across participants; D-E: Error shading indicates 95% confidence interval around the line of best fit, collapsed across trial types (black line). Individual colored lines indicate the line of best fit within each trial type. \* $p < 0.05$ ; \*\* $p < 0.01$

148 Together, these data demonstrate that subjective affect modulates hydrocortisone effects on encoding.  
 149 Subjective arousal and positive affect bolstered memories encoded with elevated cortisol, but impaired  
 150 memories under placebo. Although our primary analyses focused on associative memory for object-scene  
 151 pairs, we observed similar patterns for item recognition of individual objects (Supplemental Figure S2).

### 152 Hydrocortisone enhances intra-hippocampal connectivity to promote emotional memory

153 After establishing that hydrocortisone interacts with subjective arousal to promote memory, we next sought  
 154 to investigate whether hippocampal mechanisms could support these memory enhancements. We first  
 155 examined whether intra-hippocampal connectivity was modulated by hydrocortisone. The hippocampus  
 156 contains multiple subfields connected to entorhinal cortex (EC), the primary input/output region for the  
 157 hippocampus (Figure 3A, left). Information from EC is relayed to CA3/DG, which then connects to CA1; CA1

158 then communicates back out to EC (Figure 3A, right). This circuit (known as the trisynaptic pathway) is  
159 particularly important for episodic memory encoding given the sparse connections and high inhibition in  
160 CA3 and DG that enable pattern separation (*Schapiro et al., 2017*). We performed a background connectiv-  
161 ity analysis (*Al-Aidroos et al., 2012*) to examine how BOLD responses throughout the hippocampal circuit  
162 co-fluctuate during encoding following hydrocortisone. Although we ran this analysis for all edges of our  
163 simplified hippocampus circuit (EC-CA23DG, CA1-CA23DG, and CA1-EC), we were particularly interested in  
164 the CA1-CA23DG edge, as this directly probes hydrocortisone effects on the hippocampus.

165 Hydrocortisone enhanced connectivity between CA1 and CA23DG [ $F(1, 72) = 5.20, p = 0.026$ ]. Although  
166 this effect was only reliable for CA1-CA23DG, it was numerically present for both EC-CA23DG [ $F(1, 72) =$   
167  $2.01, p = 0.16$ ] and EC-CA1 [ $F(1, 72) = 2.38, p = 0.13$ ] as well; (Figure 3B)]. Connectivity did not differ between  
168 trial types for any of the edges (main effect and cortisol interaction:  $p_s > 0.40$ ). These data suggest that  
169 cortisol promotes enhanced communication among hippocampal subfields.

170 Because prior work has suggested that stress can alter hippocampal-amygdala connectivity (e.g., *Vais-*  
171 *vasser et al., 2013*), we next examined whether cortisol altered connectivity between the amygdala and the  
172 hippocampal circuit (Supplemental Figure S3). Hydrocortisone was associated with a marginal decrease in  
173 amygdala-EC connectivity [ $F(1, 72) = 3.03, p = 0.086$ ], but had no effect on amygdala-CA1 [ $F(1, 72) = 2.21, p =$   
174  $0.14$ ] or amygdala-CA23DG connectivity [ $F(1, 72) = 0.41, p = 0.53$ ]. As with intra-hippocampal connectivity,  
175 amygdala-hippocampal connectivity did not differ between trial types (main effect and cortisol interaction:  
176  $p_s > 0.30$ ). Together, these data suggest a specific role for hydrocortisone in enhancing intra-hippocampal  
177 connectivity.

178 Given that intra-hippocampal, but not amygdala-hippocampal, connectivity was modulated by hydrocort-  
179 isone, we next tested how intra-hippocampal connectivity related to subsequent associative memory. We  
180 observed a three-way interaction between CA1-CA23DG connectivity, trial type, and pill,  $F(1, 68) = 4.92, p =$   
181  $0.030$  (Figure 3C). Under placebo, greater intrahippocampal connectivity was associated with stronger mem-  
182 ory, and this did not differ between trial types [ $\beta = -0.16[0.15], t(68) = -1.05, p = 0.30$ ]. However, following  
183 hydrocortisone, greater connectivity positively predicted better memory for emotional, but not neutral as-  
184 sociations (emotional vs neutral:  $\beta = 0.28[0.13], t(68) = 2.14, p = 0.036$ ).

185 This finding suggests a reprioritization of hippocampal connectivity to promote emotional, rather than  
186 neutral, memories under hydrocortisone. To probe whether this relationship was driven by emotionality,  
187 we exploited the positive behavioral relationship between subjective arousal and associative memory with  
188 hydrocortisone and assessed whether hippocampal connectivity under hydrocortisone also tracked sub-  
189 jective arousal. Indeed, we observed a significant interaction between connectivity and trial type under  
190 hydrocortisone,  $F(1, 23) = 6.54, p = 0.018$ . Mirroring the relationship between connectivity and associa-  
191 tive memory, hippocampal connectivity positively tracked arousal for emotional, but not neutral, associa-  
192 tions. In contrast, subjective arousal was not related to connectivity under placebo ( $p_s > 0.50$ ), although we  
193 note that the three-way interaction between connectivity, trial type, and pill was not statistically significant  
194 [ $F(1, 68) = 2.03, p = 0.16$ ].

195 We next exploited the behavioral relationship between associative memory and subjective valence, wherein  
196 hydrocortisone-induced shifts in positive affect related to better associative memory. We probed the rela-  
197 tionship between intra-hippocampal connectivity and subjective valence. We again computed difference  
198 scores to assess whether hydrocortisone-associated changes in connectivity related to changes in valence  
199 ratings. For positive affect, the difference in CA1-CA23DG connectivity marginally interacted with trial type  
200 [ $F(1, 22) = 4.25, p = 0.051$ ], such that connectivity changes positively predicted the change in “happy” rat-  
201 ings for emotional, but not neutral trials (Figure 3E). This interaction was not present for negative affect  
202 [“unhappy” ratings,  $F(1, 22) = 0.97, p = 0.34$ ].

203 Together, these data suggest an intra-hippocampal mechanism supporting cortisol-induced enhance-  
204 ment of emotional memories. Under placebo, CA1-CA23DG connectivity predicted episodic memory for  
205 neutral stimuli, but this relationship shifted with hydrocortisone, with CA1-CA23DG connectivity selectively  
206 predicting emotional memory. CA1-CA23DG connectivity also tracked aspects of subjective affect that mod-  
207 ulate hydrocortisone effects on associative memory, thereby providing an intra-hippocampal explanation  
208 for positive effects of hydrocortisone on emotionally arousing, positively valenced memories.

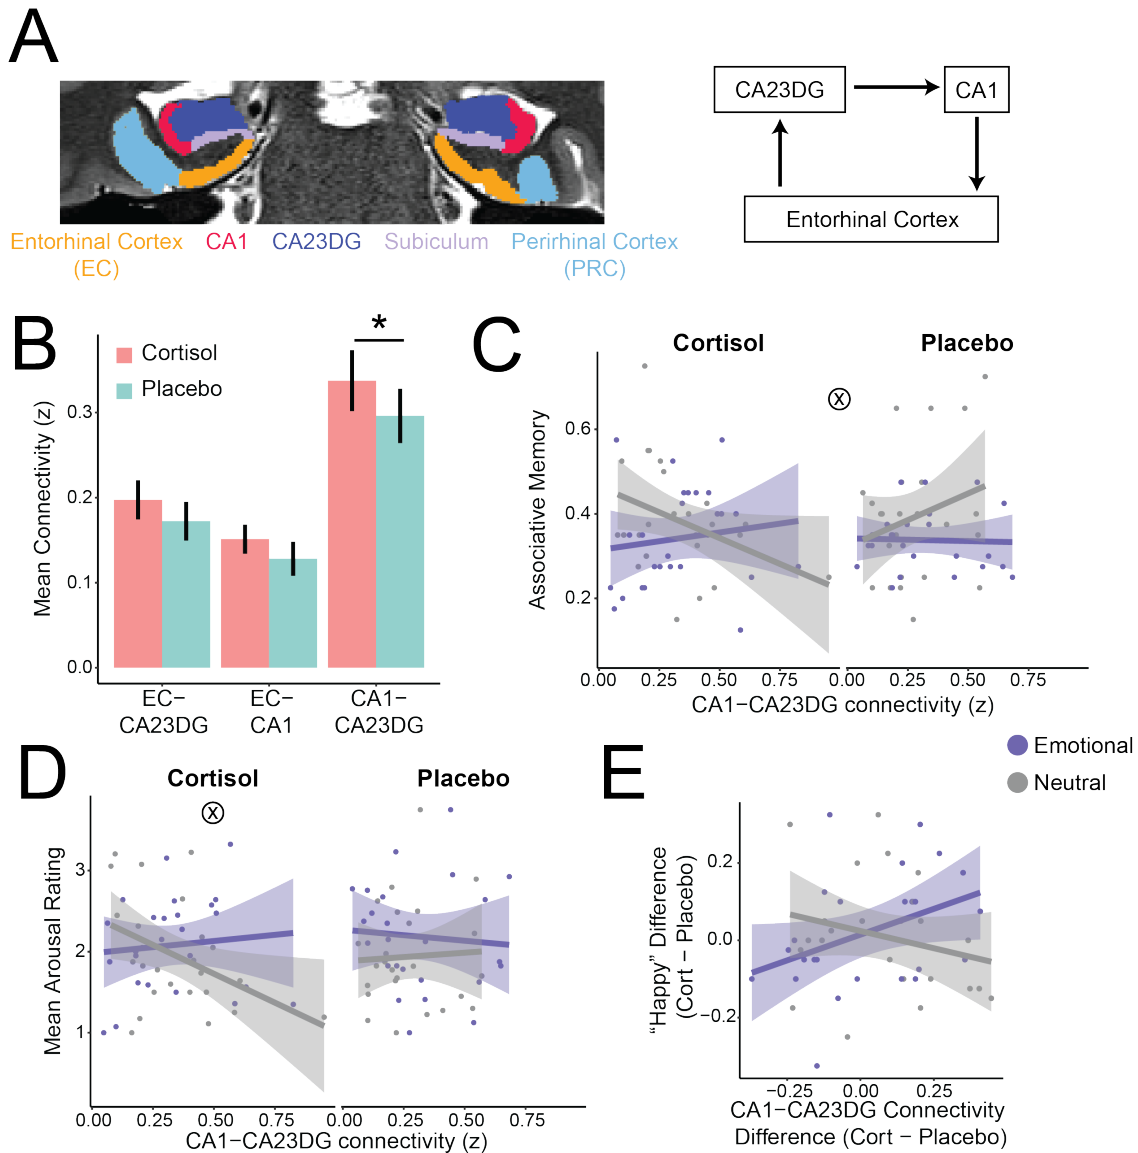

**Figure 3.** Background Connectivity Results. A) Left: example hippocampal and medial temporal lobe subfields on a representative participant; Right: schematic of hippocampal trisynaptic pathway. B) Hydrocortisone led to increased background connectivity through the hippocampal circuit. C) CA1-CA23DG connectivity interacted with pill and trial type to predict associative memory. D) CA1-CA23DG connectivity interacted with pill to predict subjective arousal. E) The cortisol-induced increase in happiness ratings as a function of the cortisol-induced increase in CA1-CA23DG connectivity. B: Error bars indicates standard error of the mean across participants; \*p < 0.05. C-E: Error shading indicates 95% confidence interval around the best fit line.

209 **Hydrocortisone reverses the relationship between hippocampal pattern similarity and**  
210 **memory**

211 The connectivity approach allowed us to examine how hydrocortisone modulates co-fluctuations in uni-  
212 variate activity between hippocampal subregions. However, the representational content housed in those  
213 subregions remains unclear. Prior work using multivariate pattern analysis of hippocampal activity demon-  
214 strated that representational distinctiveness, particularly in CA23DG, supports episodic memory encoding  
215 (*LaRocque et al., 2013; Wanjia et al., 2021*). This dissimilarity is computationally important, as minimizing  
216 overlap between neural patterns associated with similar memories allows those memories to be encoded  
217 distinctly, without interference from one another (*Favila et al., 2016; Chanales et al., 2017*). Thus, we next

218 explored the effects of hydrocortisone on representations within these hippocampal subfields during en-  
219 coding, and how the similarity of these representations relates to memory. We examined within-run pattern  
220 similarity, a metric of how similar the hippocampal pattern for an encoded association is to all other asso-  
221 ciations within that run (Figure 4A).

222 Hydrocortisone did not affect within-run pattern similarity in either CA1 [ $F(1, 72) = 1.21, p = 0.27$ ] or  
223 CA23DG [ $F(1, 72) = 0.36, p = 0.55$ ]. However, trial type did modulate CA23DG similarity [ $F(1, 72) = 4.86, p =$   
224  $0.031$ ], with relatively greater pattern similarity for emotional, relative to neutral associations (Figure 4B).  
225 To ensure that this difference was not due to visual content (i.e., greater inherent visual similarity among  
226 emotional objects), we also examined pattern similarity in lateral occipital cortex (LOC), an object-sensitive  
227 visual region. There was no effect of either pill [ $F(1, 75) = 0.01, p = 0.94$ ] or trial type [ $F(1, 75) = 0.51, p = 0.48$ ]  
228 on LOC similarity, suggesting that the trial type differences in CA23DG were not driven by visual similarity.

229 Although there was no pill effect on pattern similarity, the relationship between CA23DG similarity and  
230 subsequent associative memory did differ between pills (Figure 4C). Specifically, we observed a similarity  
231 by pill interaction [ $F(1, 68) = 5.37, p = 0.024$ ], as well as a marginal three-way interaction among similarity,  
232 pill, and trial type [ $F(1, 68) = 3.40, p = 0.070$ ]. Whereas CA23DG similarity *negatively* predicted memory un-  
233 der placebo (consistent with more distinct neural representations supporting more precise memories), it  
234 *positively* predicted memory under hydrocortisone [ $\beta = 32.2[12.7], t(68) = 2.53, p = 0.014$ ]. This pattern was  
235 not present for CA1, as there was no main effect of pattern similarity on memory, nor interactions with trial  
236 type or pill ( $ps > 0.20$ ).

237 Given that associative memory related to subjective affect, we next examined whether CA23DG similar-  
238 ity predicted arousal or the change in affect ratings. There were no reliable associations between similarity  
239 and arousal ( $ps > 0.10$ ). However, CA23DG similarity did relate to the cortisol-induced shift towards pos-  
240 itive valence. Increased CA23DG similarity with hydrocortisone tracked increased happiness ratings with  
241 hydrocortisone for emotional, but not neutral, associations [ $F(1, 22) = 5.14, p = 0.034$ ; Figure 4D].

242 Together, these data suggest that hydrocortisone reverses the relationship between neural similarity  
243 and memory. Consistent with prior work (e.g., *LaRocque et al., 2013*), CA23DG similarity negatively predicted  
244 memory under placebo; this may reflect the computational need for episodic memory to separate memo-  
245 ries encoded in a similar temporal context, in order to reduce interference across those memories at test.  
246 Intriguingly, however, we observed a positive relationship between similarity and memory under cortisol,  
247 suggesting that cortisol may lead memories to be encoded in a fundamentally different, integrated fashion.  
248 Relatively greater pattern similarity was also associated with increased “happy” ratings under cortisol, but  
249 this effect was specific to emotional associations. Together, these results suggest a distinct hippocampal  
250 mechanism for promoting emotionally salient memories under cortisol.

### 251 **Hydrocortisone blunts hippocampal subsequent memory effects**

252 Our primary interest in the current study was understanding how intra-hippocampal functional connectivity  
253 and representations change with hydrocortisone and contribute to later memory. However, prior work has  
254 focused on univariate effects of stress and cortisol, including demonstrating that stress alters hippocampal  
255 subsequent memory effects (i.e., greater hippocampal univariate activity for later remembered versus for-  
256 gotten items; *Henckens et al., 2009; Qin et al., 2012*). To facilitate comparison with prior work, we thus ran  
257 general linear models contrasting subsequently remembered versus forgotten trials (separately for each  
258 participant, pill, and trial type; Supplemental Figure S4).

259 In the whole hippocampus, there was no main effect of pill or trial type, nor an interaction between the  
260 two ( $ps > 0.30$ ). However, we observed a numerically positive subsequent memory effects for both trial types  
261 under placebo. Collapsing across trial types revealed a reliable subsequent memory effect under placebo  
262 [Mean difference = 1.36; SD = 3.24;  $t(24) = 2.10, p = 0.046$ ], consistent with prior work (e.g., *Davachi et al.,*  
263 **2003**). In contrast, although there was not a significant difference between hydrocortisone and placebo  
264 [ $t(24) = -0.69, p = 0.50$ ], there was no reliable subsequent memory effect for memories encoded under cor-  
265 tisol [Mean difference = 0.38; SD = 4.75,  $t(25) = 0.41, p = 0.68$ ]. Considering these effects within hippocampal  
266 subfields, we found a similar pattern in CA23DG, but not CA1, consistent prior work and the the proposed  
267 role of CA23DG in supporting distinct episodic memories (*Eldridge et al., 2005; Carr et al., 2010*). Together,



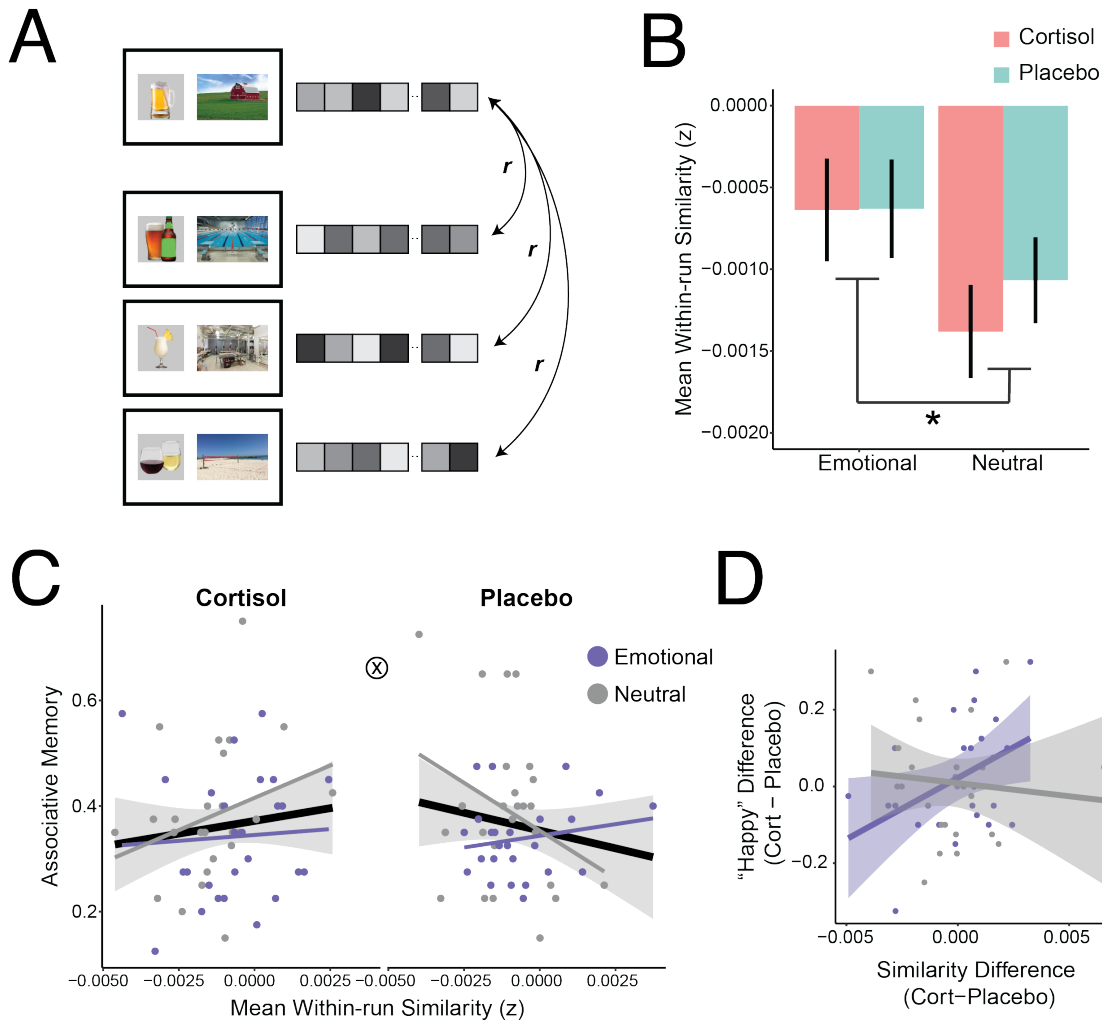

**Figure 4.** Within-run Pattern Similarity Results. A) We extracted the spatiotemporal pattern associated with each encoding trial. We then correlated each trial to all other trials (averaging the correlations across trials) to obtain a global pattern similarity metric. B) CA23DG pattern similarity differed by trial type, with relatively greater neural similarity among emotional associations. C) CA23DG pattern similarity predicted subsequent associative memory in opposing directions under cortisol versus placebo. D) The difference in CA23DG similarity from cortisol to placebo positively predicted the cortisol-induced increase in happiness ratings from emotional, but not neutral associations. B: Error bars indicate standard error of the mean across participants; \* $p < 0.05$ . C-D: Error shading indicates 95% confidence interval around the best fit line. Individual colored lines indicate the line of best fit within each trial type.

268 these results converge with prior demonstrations that stress can alter hippocampal memory formation  
 269 (*Henckens et al., 2009; Qin et al., 2012*).

## 270 Discussion

271 In the current study, we combined behavior, high-resolution imaging of the human hippocampus, and phar-  
 272 macological manipulation of hydrocortisone to provide novel insight into how hippocampal circuitry and  
 273 representations scaffold memory enhancements under stress. First, we demonstrated behaviorally that  
 274 cortisol enhances encoding of subjectively emotionally arousing memories. We then demonstrated a role  
 275 for cortisol in enhancing functional interactions between hippocampal subfields; this intra-hippocampal  
 276 connectivity supported memory under placebo and selectively supported emotional memory under cortisol.  
 277 Lastly, we demonstrated that cortisol can alter the way that memories are encoded into the hippocampus,  
 278 shifting the relationship between neural similarity and memory from negative under placebo to positive un-

279 der cortisol. Together, these data provide evidence that mechanisms *within* the hippocampus can support  
280 memory enhancements under stress.

281 Our behavioral findings build on prior demonstrations that subjective affect and cortisol interact to pro-  
282 mote memory encoding. Although cortisol administration prior to encoding did not impact memory per-  
283 formance overall, cortisol enhanced memory for participants who experienced greater subjective arousal.  
284 This arousal-specific enhancement of memories under stress has been demonstrated previously and high-  
285 lights the importance of assessing subjective responses to stimuli when measuring stress effects on mem-  
286 ory (**Buchanan and Lovallo, 2001; Abercrombie et al., 2003, 2006; Goldfarb et al., 2019**). However, many  
287 of these prior studies focused on negative affect (**Abercrombie et al., 2003, 2006; Goldfarb et al., 2019**).  
288 By using emotionally salient stimuli (alcoholic beverages) that could be perceived as either positive or nega-  
289 tive, we demonstrated that cortisol is particularly beneficial for remembering emotionally arousing, positive  
290 episodes. This finding adds to burgeoning literature that acute stress strengthens the formation of positive  
291 emotional memories (**Kamp et al., 2019**), and accords with prior work outside the stress domain demonstrat-  
292 ing that positive emotion can bolster associative memory (**Madan et al., 2019**). Relatedly, cortisol amplified  
293 the perceived emotional salience of encoded memoranda, with participants becoming less likely to rate en-  
294 coded associations as “neutral” (similar to **Abercrombie et al., 2003**). Importantly, this cortisol-induced shift  
295 in affect valuation was specific to the encoded associations, and did not reflect a broader hydrocortisone-  
296 induced change in affect (as shown with PANAS scores). Together, these results are consistent with past  
297 studies showing stress and cortisol-induced enhancements in encoding emotionally arousing experiences  
298 and provide a key extension by demonstrating the modulatory role of positive affect.

299 By combining these behavioral metrics with neuroimaging data, we provided insight into hippocampal  
300 mechanisms underlying these cortisol-associated memory enhancements. Our use of high-resolution fMRI  
301 enabled us to probe the representations of hippocampal subfields, inspired by rodent findings of diver-  
302 gent stress effects across subfields (e.g., **Alkadhi, 2019**) and human structural imaging results delineating  
303 subfield-specific effects of chronic stress and posttraumatic stress disorder (**Wang et al., 2010; Nolan et al.,**  
304 **2020; Weis et al., 2021**). This approach enabled precise localization of hippocampal contributions (rather  
305 than aggregating across the whole hippocampus; e.g. **van Stegeren, 2009; Lovallo et al., 2010; Qin et al.,**  
306 **2012**). Furthermore, using a within-participant pharmacological manipulation, we interrogated the specific  
307 role of cortisol in altering encoded memory representations. In doing so, we reveal novel avenues for hydro-  
308 cortisone to enhance hippocampal function to promote later memory, thus pushing against arguments that  
309 stress impairs hippocampal function and shifts memory toward other neural substrates (**Kim and Diamond,**  
310 **2002; Schwabe et al., 2022**).

311 We identified a novel role for glucocorticoids in enhancing human hippocampal function: Cortisol was  
312 associated with increased communication both among hippocampal subfields. This finding builds on prior  
313 rodent work suggesting that stress may alter (**Jacinto et al., 2013**) or enhance (**Stepan et al., 2012**) memory-  
314 related theta oscillations within the hippocampus. Importantly, our observed enhancement was specific to  
315 the hippocampal circuit; connectivity between the hippocampus and amygdala was not altered by exoge-  
316 nous hydrocortisone. Although this may be surprising given prior work demonstrating that stress enhances  
317 hippocampal-amygdala connectivity (**Ghosh et al., 2013; Vaisvaser et al., 2013**), the full stress response in-  
318 cludes many processes in addition to cortisol (for example, adrenergic effects on the amygdala play an im-  
319 portant role in modulating cortisol effects on the hippocampus; see **Joëls and Baram, 2009**). Cortisol alone  
320 can even reduce hippocampal-amygdala coupling (**Henckens et al., 2012**). This also highlights a limitation  
321 in generalizing our focus on cortisol to effects of the multifaceted stress response.

322 In addition to a broad enhancement with hydrocortisone, we found that intra-hippocampal connec-  
323 tivity related to memory performance under both cortisol and placebo conditions. Under placebo, intra-  
324 hippocampal (CA1-CA23DG) connectivity positively predicted memory for neutral associations, consistent  
325 with the theorized role for this circuit in supporting episodic memories (**Schapiro et al., 2017**). Under cor-  
326 tisol, in contrast, connectivity positively predicted memory for emotional associations, but negatively for  
327 neutral associations. This finding may suggest that the “typical” intrahippocampal mechanism supporting  
328 successful memory encoding is repurposed under cortisol to prioritize memory for emotional associations.  
329 Highlighting the importance of the emotional nature of these associations, connectivity under cortisol also

330 tracked subjective arousal and valence. Interestingly, the directionality of connectivity/behavior associa-  
331 tions differed between emotional and neutral trial types, despite behavioral evidence that arousal broadly  
332 tracks memory across trial types. Future work is needed to understand stress and emotion-induced changes  
333 in hippocampal encoding mechanisms, and what neural mechanism supports cortisol-induced enhance-  
334 ments in memory for putatively neutral stimuli.

335 The connectivity results indicate a common mechanism supporting memory: intra-hippocampal connec-  
336 tivity broadly promotes memory under placebo, but selectively promotes emotional memory under corti-  
337 sol. In contrast, the pattern similarity findings indicate diverging hippocampal encoding processes. Under  
338 placebo, pattern *dissimilarity* predicted better subsequent memory. This finding is consistent with prior  
339 empirical work (**LaRocque et al., 2013; Favila et al., 2016; Chanales et al., 2017; Wanjia et al., 2021**) and  
340 theoretical models of hippocampal function, which posit that distinct neural representations are needed  
341 to support episodic memory (**McClelland et al., 1995; Brunec et al., 2020**). In contrast, under cortisol, rela-  
342 tively greater pattern *similarity* predicted memory. This pattern is similar to one recently observed in the  
343 amygdala (**Bierbrauer et al., 2021**). Closer examination of our data suggest an affect-driven mechanism.  
344 First, although the similarity-memory association did not interact with trial type, greater similarity broadly  
345 tracked enhanced emotional memory (irrespective of pill). Second, we observed overall greater similarity  
346 for emotional compared to neutral stimuli (again, irrespective of pill). This did not appear to be driven by  
347 perceptual or semantic features, as this pattern was not observed in lateral occipital cortex. These results  
348 may converge with prior demonstrations that greater pattern similarity at encoding (across a range of brain  
349 regions, including the hippocampus) predicts better emotional memory (**Visser et al., 2013; Tambini et al.,**  
350 **2017**). Thus, one interpretation of the similarity/memory relationships for neutral memoranda (i.e., neg-  
351 ative under placebo but positive under hydrocortisone) is that, with hydrocortisone, emotional encoding  
352 mechanisms are engaged to support neutral memory as well. Together, these data suggest that memory  
353 formation under cortisol may be supported by distinct underlying computations. Whereas distinctive mem-  
354 ory representations may support memory encoding under typical circumstances, more similar memory  
355 representations may benefit memory with cortisol.

356 Considered together, the connectivity and pattern similarity analyses provide evidence that the hip-  
357 pocampus can indeed support enhanced memory formation under hydrocortisone. Importantly, these two  
358 signals may serve distinct encoding purposes: intra-hippocampal connectivity primarily explained memory  
359 for emotionally salient associations, and CA23DG similarity primarily accounted for memory for neutral  
360 information. Importantly, despite robust evidence that the hippocampus can support memory encoding  
361 under hydrocortisone, we found evidence for a blunted univariate subsequent memory effect in the hip-  
362 pocampus. Although we interpret these results with caution, given that the difference between placebo  
363 and hydrocortisone was not significant, this is consistent with past reports (**Qin et al., 2012**). Although dis-  
364 rupted subsequent memory effects have been interpreted as evidence against hippocampal involvement in  
365 stress-induced memory enhancements, our findings challenge this interpretation. Despite replicating this  
366 canonical “negative hippocampal” result, we also provide evidence that intrahippocampal function under  
367 cortisol can indeed predict subsequent memory. By uncovering positive cortisol effects on hippocampal  
368 function, our results highlight the importance of considering multiple hippocampal encoding mechanisms  
369 when assessing the effects of cortisol and stress on memory. Whereas cortisol may impair some hippocam-  
370 pal encoding mechanisms, it may yet enhance or alter other avenues by which the hippocampus drives  
371 successful memory.

## 372 **Acknowledgments**

373 The authors are grateful to Nia Fogelman for assisting with randomization and maintaining the double  
374 blind and to Gretchen Hermes for performing physical exams. This work was supported by a Yale Center  
375 for Clinical Investigation Junior Faculty Scholar Award (NIH/NCATS KL2 TR001862 to E.V.G.) and the National  
376 Institutes of Health (K01 AA027832 to E.V.G.).

## 377 **Author contributions**

378 E.V.G. and R.S. conceived the study. E.V.G. and B.B.H. designed the experiments. B.B.H. performed the exper-  
379 iments. E.V.G. and R.S. supervised data collection. N.B.T-B. contributed imaging sequences and analysis  
380 pipelines. E.V.G., B.E.S., and N.B.T-B. conceived behavioral and neural analyses. B.B.H. organized and pro-  
381 cessed the behavioral data. E.V.G. and B.B.H. preprocessed the fMRI data. B.E.S. carried out subsequent  
382 analyses on the behavioral and fMRI data. B.E.S. and E.V.G. wrote the manuscript with assistance from  
383 B.B.H. All authors edited the manuscript.

## 384 **Declaration of Interests**

385 The authors declare no competing interests.

## 386 **Methods**

### 387 **Participants**

388 Twenty-seven healthy, right-handed human participants (16 male; mean age 27.6; range 21-44) completed  
389 all five sessions of the experiment. This sample size was determined by a power analysis from pilot data  
390 indicating that associations between cortisol and memory could be observed with  $N = 25$  ( $G^*$ Power: cor-  
391 relation = .508, power = 0.85). One participant's Week 2 data were excluded from all analyses because of  
392 technical error (they were shown different stimuli at encoding and retrieval).

393 Participants were recruited from the New Haven community via online advertisements and flyers. All  
394 participants were fluent in English, had BMI between 18-35 (to ensure standardized metabolism of hydro-  
395 cortisone, which is lipophilic), had normal or corrected-to-normal vision, and did not meet criteria for any  
396 substance use disorder (excluding caffeine). To reduce factors that could influence their reaction to hydro-  
397 cortisone, participants were excluded if they were currently using medications/drugs that interfere with the  
398 HPA axis response such as SSRIs, beta-blockers, or corticosteroids. Further, peri- and post-menopausal fe-  
399 males, pregnant or lactating females, and those with hysterectomies were excluded. Participants were also  
400 excluded based on contraindications for MRI or hydrocortisone tablets. Participants were also required to  
401 have had a physical examination within the last 6 months to determine that they could safely complete  
402 study procedures; if not, one was administered by a Yale School of Medicine MD. All participants provided  
403 written informed consent to complete the study and all procedures were approved by the Yale Institutional  
404 Review Board.

### 405 **Method Details**

#### 406 *Procedure Overview*

407 We employed a double-blind, placebo-controlled, crossover design (Figure 1). At the start of each session,  
408 participants provided urine samples to undergo drug and pregnancy testing as well as a breathalyzer to  
409 ensure sobriety. All experimental sessions occurred between 12:00pm and 6:00pm to control for circadian  
410 fluctuations in cortisol (*Lupien et al., 2007*).

411 After an intake appointment to determine eligibility, participants completed two rounds of encoding  
412 (Day 1) and memory retrieval (Day 2, 24h later). These rounds were separated by an average of 16.22 days  
413 ( $SD = 14.53$ ). Prior the encoding session, participants received a tablet containing either 20mg hydrocorti-  
414 sone or a visually identical placebo pill compounded by the Yale Investigational Drug Service (order coun-  
415 terbalanced; see Hydrocortisone Administration and Cortisol Measurement: Randomization). Functional  
416 magnetic resonance imaging (fMRI) data were acquired during each encoding session along with salivary  
417 samples to measure peripheral cortisol. Participants were instructed not to consume alcohol for 24h prior  
418 to fMRI sessions.

#### 419 *Intake Appointment*

420 After providing informed consent, participants underwent the Structured Clinical Interview for the DSM-5  
421 or SCID (*First, 2014*) with a trained interviewer to determine if they had ever met criteria for a substance use

422 disorder (SUD) or alcohol use disorder (AUD; N = 3 excluded following intake due to past or present endorse-  
423 ment of AUD). Sobriety was confirmed via breathalyzer at each visit. To further classify drinking behavior,  
424 participants completed the AUDIT (**Bush et al., 1998**) administered by an experimenter and answered the  
425 Alcohol Severity Index Questionnaire, ASI (**Mäkelä, 2004**), via self-report on an experiment computer.

426 Participants also self-reported on general demographic information and filled out a series of question-  
427 naires including the Positive Affect Negative Affect Scale, PANAS (**Watson et al., 1988**). If deemed fully eligible  
428 at intake, participants were scheduled for the four sessions of the experiment.

#### 429 *Tasks*

430 **Encoding.** During the fMRI sessions, participants performed an encoding task similar to **Goldfarb et al.**  
431 (**2020**). On each trial, participants viewed object and scene photographs and were asked to vividly imagine  
432 the object as part of the scene (5s). They then indicated how they felt when imagining each object/scene  
433 pair using an MR-compatible button box, reporting their valence (unhappy, happy, or neutral) and arousal  
434 (how intensely they felt that way; 1 = not at all; 4 = extremely), and how much they wanted an alcoholic drink  
435 (1 = not at all; 4 = a lot; 2s per response). Responses were displayed in green. Trials were separated by a  
436 jittered ITI from a geometric distribution (mean = 2s). All task stimuli were presented with MATLAB using  
437 the Psychophysics Toolbox (**Brainard, 1997; Pelli, 1997**).

438 Participants completed two blocks of encoding during each scanning session, and each block contained  
439 40 object-scene pairs. Critically, the two blocks differed in the type of objects presented. One block con-  
440 tained emotionally salient alcohol-related object images (e.g., a glass of wine) and the other block contained  
441 neutral, handheld object images (e.g. a tape measure; further details regarding stimuli below). The order of  
442 encoding blocks was counterbalanced across participants. Participants were informed that their memory  
443 for object-scene pairs would be tested the following day.

444 **Retrieval.** Participants returned 24 hours after each encoding session for a series of memory tests. As  
445 stress and cortisol generally impair memory retrieval (**Gagnon and Wagner, 2016**), this timing allowed us to  
446 target hydrocortisone effects on memory encoding while avoiding lingering effects on retrieval processes.  
447 Memory tests were separated by trial type and occurred in the same order as encoding (i.e., if participants  
448 encoded emotional object-scene pairs first, they retrieved emotional memoranda first). No fMRI data were  
449 collected at retrieval.

451 **Object Recognition.** To assess memory for individual objects, participants first viewed all objects from en-  
452 coding (N = 80) intermixed with novel foils from the same object subcategories (N = 80). After viewing each  
453 object (3s), participants indicated whether they thought the image was old (from the encoding session the  
454 day before) or new. Responses were on a 4-point scale (“confident old”, “unsure old”, “unsure new”, “confi-  
455 dent new”; 2s per response, 0.5s ITI).

457 **Associative Memory.** To assess memory for the object-scene pairings, participants were shown an object  
458 image from encoding. They were first asked if it was paired with an indoor or outdoor scene (maximum  
459 response time 2s). They were then shown the same object image along with four scenes (2s): the orig-  
460 inal scene paired at encoding, a different scene presented at encoding to control for familiarity, and two  
461 matched perceptual lures (one lure per encoded scene). Participants indicated with which of the four scenes  
462 the object was paired (up to 4s). They were told that if they remembered what scene was shown with the  
463 object, but not exactly which image was displayed, to make their best guess between the two images depict-  
464 ing that scene. Pairing the scenes with perceptually matched foils allowed us to dissociate more general,  
465 or gist-based memories (e.g., the picture I saw was a beach) versus specific associative memories (e.g., the  
466 picture I saw was *that* beach). They were last asked how confident they were in their memory for the scene  
467 (1 = “not at all”; 4 = “extremely”; up to 2s). Questions were separated by an ISI of .5s. Choosing the correct,  
468 specific scene from encoding denoted correct associative memory.

470

#### 471 *Task Stimuli*

472 **Objects.** A total of 400 photographs of emotionally salient alcohol and neutral handheld stimuli were ob-  
473 tained from prior studies (*Dunsmoor et al., 2012; Fey et al., 2017; Van Der Linden et al., 2015; Sinha et al.,*  
474 **2022**) and from Google image searches. All images were edited to appear on a grey background with visible  
475 text occluded and were resized to 200 x 200 pixels. Images were chosen to be perceptually distinct from  
476 one another and were evenly distributed into four subcategories (alcohol: beer, wine, liquor, and mixed  
477 drinks; neutral: items likely to be found in a kitchen, garage, bathroom, and office). A separate validation  
478 experiment was conducted to select a subset of 320 images matched on perceptual (e.g., level of detail  
479 (*Dager et al., 2014*) and familiarity (*Bainbridge et al., 2017*)), but not affective features. We chose not to  
480 match stimuli on valence or arousal, as we aimed for emotional, but not neutral, stimuli to induce affect.

481

482 **Scenes.** A total of 320 indoor and outdoor scene images were obtained from the SUN database (*Xiao et al.,*  
483 **2010**) and Google Image searches. Specifically, we obtained 80 indoor and 80 outdoor scene images, each  
484 with a perceptual match (e.g., 2 pictures of beaches) that served as a foil during the associative memory  
485 test. As with object stimuli, a separate validation sample was collected to confirm that perceptual similarity  
486 across pairmate images was matched.

#### 487 *Hydrocortisone Administration and Cortisol Measurement*

488 **Randomization.** After intake, participants were pseudorandomly assigned to receive either hydrocortisone  
489 or placebo prior to their first encoding session, taking into account their age, sex, level of education, and  
490 drinking level. Pill order was determined by an unblinded statistician, leaving the experimenter (B.B.H.)  
491 blind to participant condition.

492

493 **Pill Administration.** Across the two weeks, participants received one oral tablet of hydrocortisone 20mg  
494 and one oral tablet of placebo (sucrose). The two pills were physically identical. The order of pill admin-  
495 istration (week 1 or 2) was counterbalanced by an unblinded statistician, with all additional experimental  
496 personnel and participants blinded for the duration of the study. Pills were compounded by the Yale Inves-  
497 tigational Drug Service and stored at 20-25C. Pills were administered approximately one hour prior to the  
498 start of the first encoding run (consistent with *Buchanan and Lovallo, 2001*).

499

500 **Measuring cortisol levels.** Participants provided six salivary samples over the two fMRI sessions (3 per  
501 session) to measure cortisol concentration. The baseline sample was obtained approximately 10 minutes  
502 after arrival (after acclimation to the environment and prior to pill administration). The encoding sample  
503 was obtained immediately prior to the first encoding run, approximately 1 hour after pill administration.  
504 The final sample was obtained after participants exited the scanner. Samples were collected using Starst-  
505 edt Salivate Tubes and samples were processed by the Yale Center for Clinical Investigation (YCCI) using  
506 radioimmunoassay (RIA).

507

508 **Measuring Awareness.** To measure subjective awareness of pill administration, participants reported  
509 which pill they thought they had received (response options: Cortisol, Placebo, or Not Sure). This was only  
510 asked on pill administration (scan) days, both immediately after consuming the pill and after the fMRI scan.

#### 511 *fMRI Procedure*

512 Participants underwent fMRI scanning after pill administration on both days. Specifically, participants per-  
513 formed the encoding task (described above) while BOLD fMRI data were acquired. We additionally collected  
514 a localizer run and resting-state fMRI scans.

515

516 **Localizer Run.** Prior to encoding, participants completed a 6-min run in which they viewed images (1s  
517 each, 0.5s ITI) and were instructed to button press anytime an image repeated twice in a row (1-back). They  
518 viewed 8 blocks of 22 images each. The blocks consisted of scenes, emotionally salient alcoholic beverages,  
519 neutral handheld objects, or phase-scrambled versions of the alcohol and neutral images. None of these

520 images were repeated in the subsequent encoding task. Each category appeared twice during the 8 blocks  
521 in a randomized order per subject.

522

523 **Rest Runs.** Participants underwent three 6-minute rest scans throughout each session: one prior to encod-  
524 ing (after the localizer run) and one immediately after each encoding run. No data from these rest runs are  
525 reported in the current paper.

### 526 *MRI Acquisition Parameters*

527 Data were acquired on Siemens 3T Prisma scanners using a 64-channel coil at the Magnetic Resonance  
528 Research Center at Yale University. Data were acquired across three scanners (N = 6 on scanner A, N = 2 on  
529 scanner B, N = 19 on scanner C). Each participant completed both of their MRI sessions on a single scanner.  
530 Parameters were the same across scanners. Functional images were acquired using an echoplanar imaging  
531 (EPI) sequence with the following parameters: TR = 1000ms, TE = 30ms, 75 axial slices, voxel size = 2x2x2  
532 mm, flip angle = 55 degrees, multiband factor = 5, interleaved acquisition, FOV: 220x220.

533 Anatomical data were acquired using one T1-weighted 3D MPRAGE sequence (TR = 2400ms, TE = 1.22ms,  
534 208 sagittal slices, voxel size = 1x1x1 mm, flip angle = 8 degrees, FOV: 256x256) and one T2-weighted turbo  
535 spin echo (TR=11170 ms, TE = 93ms, 54 coronal slices, voxel size = 0.44 x 0.44 x 1.5mm, distance factor=20%,  
536 flip angle = 150 degrees).

### 537 **Quantification and Statistical Analysis**

#### 538 *fMRI Preprocessing*

539 fMRI data were preprocessed using FSL 6.0.1. All encoding runs met criteria for inclusion based on motion  
540 (defined a priori as >1.5mm absolute mean frame-to-frame displacement, as computed by FSL's MCLFIRT;  
541 **Jenkinson et al., 2002**). Data were skull-stripped (BET; **Smith, 2002**), pre-whitened (FILM; **Woolrich et al.,**  
542 **2001**), and high-pass filtered at 0.01 Hz to remove low-frequency signal drift. We then used FSL's FEAT () to  
543 run a GLM per run to control for motion and covariates of no interest. Regressors included 6 linear esti-  
544 mated motion parameters and white matter timeseries (each plus temporal derivatives) and stick function  
545 regressors for nonlinear motion outliers. No smoothing was applied.

546 For background connectivity analyses (see below), we additionally removed trial-evoked signal (image  
547 on/offset and button presses modeled using boxcars convolved with a double-gamma HRF, plus temporal  
548 derivatives).

549 In all analyses, model residuals were aligned to a reference functional scan and then to the participant's  
550 high-resolution T1 anatomical scan using boundary based registration (**Greve and Fischl, 2009**). The high-  
551 resolution T2 anatomical image (used for defining hippocampal subregions; see below) was also registered  
552 to the participant's T1 anatomical scan using FSL's FLIRT (**Jenkinson and Smith, 2001**).

#### 553 *Regions of Interest Definition*

554 Hippocampal subfields and medial temporal lobe cortical regions were defined individually for each par-  
555 ticipant primarily based on their T2-weighted anatomical images. Segmentation was done automatically  
556 (using both the T1- and T2-weighted anatomical images) using the automated segmentation of hippocam-  
557 pus subfields (ASHS) software package (**Yushkevich et al., 2015**). We used an atlas containing 51 manual  
558 segmentations of hippocampal subfields (**Aly and Turk-Browne, 2016a,b**). The automated segmentations  
559 were visually inspected for quality assurance and in 4 cases when automatic segmentation was particularly  
560 poor, manual segmentation was performed. Manual segmentation was performed using the procedure  
561 (i.e., using the same anatomical landmarks) as the segmentations which comprised the atlas (**Insausti et al.,**  
562 **1998; Pruessner et al., 2002; Duvernoy, 2005**), as described in detail in **Aly and Turk-Browne (2016b)**. The hip-  
563 pocampus was segmented into CA1, CA2/3, and dentate gyrus (DG) subfields; medial temporal lobe cortex  
564 was segmented into entorhinal cortex (EC), perirhinal cortex (PRC), and parahippocampal cortex (PHC). For  
565 analysis purposes, the CA2/3 and DG subfields were concatenated into a single CA23DG subfield. Further,  
566 a whole hippocampus ROI was constructed by concatenating the CA23DG, CA1, and subiculum ROIs. One

567 participant did not have a high-resolution T2-weighted image, and thus their hippocampal subfields could  
568 not be segmented; this participant was excluded from all neural analysis looking at the hippocampus.

569 In addition to MTL ROIs, we analyzed data from amygdala and lateral occipital cortex (LOC). Anatomical  
570 amygdala ROIs were defined for each participant based on their T1 MPRAGE scans using FSL's FIRST  
571 automated segmentation tool (**Patenaude et al., 2011**). LOC ROIs were functionally defined based on the lo-  
572 calizer scan. These data preprocessed as described above for encoding runs, then residuals were smoothed  
573 (6mm FWHM), and entered into subject-level GLMs to extract beta values per block type (emotionally salient  
574 objects, neutral objects, scenes, and phase-scrambled images). These subject-level estimates were aligned  
575 to MNI space and entered into a group-level ANOVA (AFNI's 3dANOVA3) as a function of pill and image  
576 type. LOC was defined from a post-hoc contrast of neutral objects vs. scrambled images, cluster-corrected  
577 ( $p < .001$ ,  $\alpha = .05$ , AFNI's 3dClustSim) and then masked with the Harvard-Oxford Probabilistic Atlas definition  
578 for LOC (50% threshold). This mask was then aligned to each participant's functional data.

#### 579 *Background Connectivity Analysis*

580 To examine fluctuations among hippocampal subfields during encoding, we conducted a background con-  
581 nectivity analysis (e.g., **Norman-Haignere et al., 2012; Al-Aidroos et al., 2012; Córdova et al., 2016**). After  
582 regressing out the task-evoked signal from each fMRI run as described above, we extracted the mean resid-  
583 ual timeseries across voxels in each ROI. We then correlated the timeseries between pairs of ROIs. These  
584 correlations were then normalized using a Fisher  $r$ -to- $z$  transform for further analysis.

#### 585 *Representational Similarity Analysis*

586 To probe the representational content of encoded associations in the hippocampus, we computed within-  
587 run global pattern similarity (similar to **LaRocque et al., 2013; Tomparry and Davachi, 2017; Cowan et al.,**  
588 **2020**). For each encoded association, we extracted the associated pattern of activity per ROI across voxels  
589 and time (5 TRs during which the object-scene pair was on screen). To account for the hemodynamic lag,  
590 we shifted the data by 5s (5 TRs), such that the extracted pattern reflected the BOLD activity 5-10s after  
591 the true onset. We then correlated these spatiotemporal vectors among all pairs of trials within a run and  
592 computed the average correlation. As in the background connectivity analyses, we then normalized these  
593 averaged correlations via Fisher  $r$ -to- $z$  transform.

#### 594 *Univariate Subsequent Memory Analysis*

595 To examine whether hippocampal activation differentiated subsequently remembered versus forgotten as-  
596 sociations, we conducted a univariate subsequent memory analysis (e.g., **Davachi et al., 2003**). We first  
597 smoothed the residuals from the preprocessing models above (6mm FWHM) and then ran a separate GLM  
598 for each encoding run for each participant. We included separate regressors for subsequently remembered  
599 versus forgotten trials plus their temporal derivative. Each trial was modeled as a boxcar (with a duration  
600 of 5s), convolved with a double-gamma HRF. We then computed the contrast between subsequently re-  
601 membered and subsequently forgotten associations. For each ROI, we extracted these contrast estimates  
602 averaged across voxels within the ROI, separately for each trial type and pill. We refer to this difference as  
603 the "Subsequent Memory Effect".

#### 604 *Statistical Modeling*

605 All statistical analyses were conducted as linear mixed effect models and were performed in R (version  
606 4.1.3) using the `nlme` package (**Pinheiro et al., 2022**). All models treated participant as a random effect, such  
607 that a random intercept was computed for each participant. For analyses that examined the effects of trial  
608 type and pill, we additionally included covariates of week, pill order, and trial type order. For analyses that  
609 examined a difference between cortisol and placebo, we included covariates of pill order and trial type  
610 order. Follow-up tests were performed using the `emmeans` package (**Lenth, 2022**), with the exception of the  
611 subsequent memory effect analyses, in which we used one-sample  $t$ -tests to quantify whether remembered  
612 versus forgotten contrasts differed from 0.



## 613 **References**

- 614 Abercrombie, H. C., Kalin, N. H., Thurow, M. E., Rosenkranz, M. A., and Davidson, R. J. (2003). Cortisol variation in humans  
615 affects memory for emotionally laden and neutral information. *Behavioral neuroscience*, 117(3):505.
- 616 Abercrombie, H. C., Speck, N. S., and Monticelli, R. M. (2006). Endogenous cortisol elevations are related to memory  
617 facilitation only in individuals who are emotionally aroused. *Psychoneuroendocrinology*, 31(2):187–196.
- 618 Al-Aidroos, N., Said, C. P., and Turk-Browne, N. B. (2012). Top-down attention switches coupling between low-level and  
619 high-level areas of human visual cortex. *Proceedings of the National Academy of Sciences*, 109(36):14675–14680.
- 620 Alkadhi, K. A. (2019). Cellular and molecular differences between area ca1 and the dentate gyrus of the hippocampus.  
621 *Molecular neurobiology*, 56(9):6566–6580.
- 622 Aly, M. and Turk-Browne, N. B. (2016a). Attention promotes episodic encoding by stabilizing hippocampal representations.  
623 *Proceedings of the National Academy of Sciences*, 113(4):E420–E429.
- 624 Aly, M. and Turk-Browne, N. B. (2016b). Attention stabilizes representations in the human hippocampus. *Cerebral Cortex*,  
625 26(2):783–796.
- 626 Bainbridge, W. A., Dilks, D. D., and Oliva, A. (2017). Memorability: A stimulus-driven perceptual neural signature distinctive  
627 from memory. *NeuroImage*, 149:141–152.
- 628 Bakker, A., Kirwan, C. B., Miller, M., and Stark, C. E. (2008). Pattern separation in the human hippocampal ca3 and dentate  
629 gyrus. *science*, 319(5870):1640–1642.
- 630 Bierbrauer, A., Fellner, M.-C., Heinen, R., Wolf, O. T., and Axmacher, N. (2021). The memory trace of a stressful episode.  
631 *Current Biology*, 31(23):5204–5213.
- 632 Bini, J., Parikh, L., Lacadie, C., Hwang, J. J., Shah, S., Rosenberg, S. B., Seo, D., Lam, K., Hamza, M., De Aguiar, R. B., et al.  
633 (2022). Stress-level glucocorticoids increase fasting hunger and decrease cerebral blood flow in regions regulating  
634 eating. *NeuroImage: Clinical*, 36:103202.
- 635 Brainard, D. H. (1997). The psychophysics toolbox. *Spatial Vision*, 10(4):433–436.
- 636 Brunec, I. K., Robin, J., Olsen, R. K., Moscovitch, M., and Barense, M. D. (2020). Integration and differentiation of hippocampal  
637 memory traces. *Neuroscience & Biobehavioral Reviews*, 118:196–208.
- 638 Buchanan, T. W. and Lovallo, W. R. (2001). Enhanced memory for emotional material following stress-level cortisol treat-  
639 ment in humans. *Psychoneuroendocrinology*, 26(3):307–317.
- 640 Bush, K., Kivlahan, D. R., McDonell, M. B., Fihn, S. D., Bradley, K. A., (ACQUIP, A. C. Q. I. P., et al. (1998). The audit alcohol  
641 consumption questions (audit-c): an effective brief screening test for problem drinking. *Archives of Internal Medicine*,  
642 158(16):1789–1795.
- 643 Carr, V. A., Viskontas, I. V., Engel, S. A., and Knowlton, B. J. (2010). Neural activity in the hippocampus and perirhinal cortex  
644 during encoding is associated with the durability of episodic memory. *Journal of Cognitive Neuroscience*, 22(11):2652–  
645 2662.
- 646 Chanales, A. J., Oza, A., Favila, S. E., and Kuhl, B. A. (2017). Overlap among spatial memories triggers repulsion of hip-  
647 pocampal representations. *Current Biology*, 27(15):2307–2317.
- 648 Córdova, N. I., Tomparý, A., and Turk-Browne, N. B. (2016). Attentional modulation of background connectivity between  
649 ventral visual cortex and the medial temporal lobe. *Neurobiology of learning and memory*, 134:115–122.
- 650 Cowan, E., Liu, A., Henin, S., Kothare, S., Devinsky, O., and Davachi, L. (2020). Sleep spindles promote the restructur-  
651 ing of memory representations in ventromedial prefrontal cortex through enhanced hippocampal-cortical functional  
652 connectivity. *Journal of Neuroscience*, 40(9):1909–1919.
- 653 Dager, A. D., Anderson, B. M., Rosen, R., Khadka, S., Sawyer, B., Jiantonio-Kelly, R. E., Austad, C. S., Raskin, S. A., Tennen,  
654 H., Wood, R. M., et al. (2014). Functional magnetic resonance imaging (fmri) response to alcohol pictures predicts  
655 subsequent transition to heavy drinking in college students. *Addiction*, 109(4):585–595.
- 656 Davachi, L. (2006). Item, context and relational episodic encoding in humans. *Current opinion in neurobiology*, 16(6):693–  
657 700.
- 658 Davachi, L., Mitchell, J. P., and Wagner, A. D. (2003). Multiple routes to memory: distinct medial temporal lobe processes  
659 build item and source memories. *Proceedings of the National Academy of Sciences*, 100(4):2157–2162.

- 660 de Voogd, L. D., Klumpers, F., Fernández, G., and Hermans, E. J. (2017). Intrinsic functional connectivity between amygdala  
661 and hippocampus during rest predicts enhanced memory under stress. *Psychoneuroendocrinology*, 75:192–202.
- 662 Duncan, K. D. and Schlichting, M. L. (2018). Hippocampal representations as a function of time, subregion, and brain  
663 state. *Neurobiology of learning and memory*, 153:40–56.
- 664 Dunsmoor, J. E., Martin, A., and LaBar, K. S. (2012). Role of conceptual knowledge in learning and retention of conditioned  
665 fear. *Biological psychology*, 89(2):300–305.
- 666 Duvernoy, H. M. (2005). *The Human Hippocampus: Functional Anatomy, Vascular-ization and Serial Sections with MRI*.  
667 Springer.
- 668 Eldridge, L. L., Engel, S. A., Zeineh, M. M., Bookheimer, S. Y., and Knowlton, B. J. (2005). A dissociation of encoding and  
669 retrieval processes in the human hippocampus. *Journal of Neuroscience*, 25(13):3280–3286.
- 670 Favila, S. E., Chanales, A. J., and Kuhl, B. A. (2016). Experience-dependent hippocampal pattern differentiation prevents  
671 interference during subsequent learning. *Nature communications*, 7(1):1–10.
- 672 Fey, W., Moggi, F., Rohde, K. B., Michel, C., Seitz, A., and Stein, M. (2017). Development of stimulus material for research  
673 in alcohol use disorders. *International Journal of Methods in Psychiatric Research*, 26(1):e1527.
- 674 First, M. B. (2014). Structured clinical interview for the dsm (scid). *The encyclopedia of clinical psychology*, pages 1–6.
- 675 Gagnon, S. A. and Wagner, A. D. (2016). Acute stress and episodic memory retrieval: neurobiological mechanisms and  
676 behavioral consequences. *Annals of the New York Academy of Sciences*, 1369(1):55–75.
- 677 Ghosh, S., Laxmi, T. R., and Chattarji, S. (2013). Functional connectivity from the amygdala to the hippocampus grows  
678 stronger after stress. *Journal of Neuroscience*, 33(17):7234–7244.
- 679 Goldfarb, E. V. (2019). Enhancing memory with stress: progress, challenges, and opportunities. *Brain and Cognition*,  
680 133:94–105.
- 681 Goldfarb, E. V., Fogelman, N., and Sinha, R. (2020). Memory biases in alcohol use disorder: enhanced memory for contexts  
682 associated with alcohol prospectively predicts alcohol use outcomes. *Neuropsychopharmacology*, 45(8):1297–1305.
- 683 Goldfarb, E. V. and Phelps, E. A. (2017). Stress and the trade-off between hippocampal and striatal memory. *Current*  
684 *Opinion in Behavioral Sciences*, 14:47–53.
- 685 Goldfarb, E. V., Tompary, A., Davachi, L., and Phelps, E. A. (2019). Acute stress throughout the memory cycle: Diverging  
686 effects on associative and item memory. *Journal of Experimental Psychology: General*, 148(1):13.
- 687 Greve, D. N. and Fischl, B. (2009). Accurate and robust brain image alignment using boundary-based registration. *Neu-*  
688 *roimage*, 48(1):63–72.
- 689 Harrewijn, A., Vidal-Ribas, P., Clore-Gronenborn, K., Jackson, S. M., Pisano, S., Pine, D. S., and Stringaris, A. (2020). Associa-  
690 tions between brain activity and endogenous and exogenous cortisol—a systematic review. *Psychoneuroendocrinology*,  
691 120:104775.
- 692 Heinbockel, H., Quaedflieg, C. W., Schneider, T. R., Engel, A. K., and Schwabe, L. (2021). Stress enhances emotional  
693 memory-related theta oscillations in the medial temporal lobe. *Neurobiology of Stress*, 15:100383.
- 694 Henckens, M. J., Hermans, E. J., Pu, Z., Joëls, M., and Fernández, G. (2009). Stressed memories: how acute stress affects  
695 memory formation in humans. *Journal of Neuroscience*, 29(32):10111–10119.
- 696 Henckens, M. J., van Wingen, G. A., Joels, M., and Fernandez, G. (2012). Corticosteroid induced decoupling of the amygdala  
697 in men. *Cerebral cortex*, 22(10):2336–2345.
- 698 Hermans, E. J., Henckens, M. J., Joëls, M., and Fernández, G. (2014). Dynamic adaptation of large-scale brain networks in  
699 response to acute stressors. *Trends in neurosciences*, 37(6):304–314.
- 700 Insausti, R., Juottonen, K., Soininen, H., Insausti, A. M., Partanen, K., Vainio, P., Laakso, M. P., and Pitkänen, A. (1998). Mr  
701 volumetric analysis of the human entorhinal, perirhinal, and temporopolar cortices. *American journal of neuroradiology*,  
702 19(4):659–671.
- 703 Jacinto, L. R., Reis, J. S., Dias, N. S., Cerqueira, J. J., Correia, J. H., and Sousa, N. (2013). Stress affects theta activity in limbic  
704 networks and impairs novelty-induced exploration and familiarization. *Frontiers in Behavioral Neuroscience*, 7:127.

- 705 Jenkinson, M., Bannister, P., Brady, M., and Smith, S. (2002). Improved optimization for the robust and accurate linear  
706 registration and motion correction of brain images. *Neuroimage*, 17(2):825–841.
- 707 Jenkinson, M. and Smith, S. (2001). A global optimisation method for robust affine registration of brain images. *Medical*  
708 *image analysis*, 5(2):143–156.
- 709 Joëls, M. and Baram, T. Z. (2009). The neuro-symphony of stress. *Nature reviews neuroscience*, 10(6):459–466.
- 710 Joëls, M., Pu, Z., Wiegert, O., Oitzl, M. S., and Krugers, H. J. (2006). Learning under stress: how does it work? *Trends in*  
711 *cognitive sciences*, 10(4):152–158.
- 712 Kamp, S.-M., Endemann, R., Domes, G., and Mecklinger, A. (2019). Effects of acute psychosocial stress on the neural  
713 correlates of episodic encoding: Item versus associative memory. *Neurobiology of Learning and Memory*, 157:128–138.
- 714 Karst, H., Berger, S., Turiault, M., Tronche, F., Schütz, G., and Joëls, M. (2005). Mineralocorticoid receptors are indispens-  
715 able for nongenomic modulation of hippocampal glutamate transmission by corticosterone. *Proceedings of the National*  
716 *Academy of Sciences*, 102(52):19204–19207.
- 717 Karst, H. and Joëls, M. (2005). Corticosterone slowly enhances miniature excitatory postsynaptic current amplitude in  
718 mice ca1 hippocampal cells. *Journal of Neurophysiology*, 94(5):3479–3486.
- 719 Kim, J. J. and Diamond, D. M. (2002). The stressed hippocampus, synaptic plasticity and lost memories. *Nature Reviews*  
720 *Neuroscience*, 3(6):453–462.
- 721 Kim, J. J., Lee, H. J., Han, J.-S., and Packard, M. G. (2001). Amygdala is critical for stress-induced modulation of hippocampal  
722 long-term potentiation and learning. *Journal of Neuroscience*, 21(14):5222–5228.
- 723 Krugers, H. J., Alfarez, D. N., Karst, H., Parashkouhi, K., van Gemert, N., and Joëls, M. (2005). Corticosterone shifts different  
724 forms of synaptic potentiation in opposite directions. *Hippocampus*, 15(6):697–703.
- 725 Kuhlmann, S. and Wolf, O. T. (2006). Arousal and cortisol interact in modulating memory consolidation in healthy young  
726 men. *Behavioral neuroscience*, 120(1):217.
- 727 LaRocque, K. F., Smith, M. E., Carr, V. A., Witthoft, N., Grill-Spector, K., and Wagner, A. D. (2013). Global similarity and pat-  
728 tern separation in the human medial temporal lobe predict subsequent memory. *Journal of Neuroscience*, 33(13):5466–  
729 5474.
- 730 Lenth, R. V. (2022). *emmeans: Estimated Marginal Means, aka Least-Squares Means*. R package version 1.7.5.
- 731 Lovallo, W. R., Robinson, J. L., Glahn, D. C., and Fox, P. T. (2010). Acute effects of hydrocortisone on the human brain: an  
732 fmri study. *Psychoneuroendocrinology*, 35(1):15–20.
- 733 Lupien, S. J., Maheu, F., Tu, M., Fiocco, A., and Schramek, T. E. (2007). The effects of stress and stress hormones on human  
734 cognition: Implications for the field of brain and cognition. *Brain and Cognition*, 65(3):209–237.
- 735 Madan, C. R., Scott, S. M., and Kensinger, E. A. (2019). Positive emotion enhances association-memory. *Emotion*, 19(4):733.
- 736 Mäkelä, K. (2004). Studies of the reliability and validity of the addiction severity index. *Addiction*, 99(4):398–410.
- 737 McClelland, J. L., McNaughton, B. L., and O'Reilly, R. C. (1995). Why there are complementary learning systems in the  
738 hippocampus and neocortex: insights from the successes and failures of connectionist models of learning and memory.  
739 *Psychological review*, 102(3):419.
- 740 McEwen, B. S. and Sapolsky, R. M. (1995). Stress and cognitive function. *Current opinion in neurobiology*, 5(2):205–216.
- 741 McGaugh, J. L. et al. (2015). Consolidating memories. *Annu Rev Psychol*, 66(1):1–24.
- 742 Meier, J. K., Weymar, M., and Schwabe, L. (2020). Stress alters the neural context for building new memories. *Journal of*  
743 *Cognitive Neuroscience*, 32(12):2226–2240.
- 744 Molitor, R. J., Sherrill, K. R., Morton, N. W., Miller, A. A., and Preston, A. R. (2021). Memory reactivation during learning  
745 simultaneously promotes dentate gyrus/ca2, 3 pattern differentiation and ca1 memory integration. *Journal of Neuro-*  
746 *science*, 41(4):726–738.
- 747 Nolan, M., Roman, E., Nasa, A., Levins, K. J., O'Hanlon, E., O'Keane, V., and Willian Roddy, D. (2020). Hippocampal and  
748 amygdalar volume changes in major depressive disorder: a targeted review and focus on stress. *Chronic Stress*,  
749 4:2470547020944553.

- 750 Norman-Haignere, S. V., McCarthy, G., Chun, M. M., and Turk-Browne, N. B. (2012). Category-selective background con-  
751 nectivity in ventral visual cortex. *Cerebral Cortex*, 22(2):391–402.
- 752 Okuda, S., Roozendaal, B., and McGaugh, J. L. (2004). Glucocorticoid effects on object recognition memory require training-  
753 associated emotional arousal. *Proceedings of the National Academy of Sciences*, 101(3):853–858.
- 754 Patenaude, B., Smith, S. M., Kennedy, D. N., and Jenkinson, M. (2011). A bayesian model of shape and appearance for  
755 subcortical brain segmentation. *Neuroimage*, 56(3):907–922.
- 756 Pavlides, C., Watanabe, Y., Magarin, A., McEwen, B., et al. (1995). Opposing roles of type i and type ii adrenal steroid  
757 receptors in hippocampal long-term potentiation. *Neuroscience*, 68(2):387–394.
- 758 Payne, J., Jackson, E., Ryan, L., Hoscheidt, S., Jacobs, J., and Nadel, L. (2006). The impact of stress on neutral and emotional  
759 aspects of episodic memory. *Memory*, 14(1):1–16.
- 760 Payne, J. D., Jackson, E. D., Hoscheidt, S., Ryan, L., Jacobs, W. J., and Nadel, L. (2007). Stress administered prior to encoding  
761 impairs neutral but enhances emotional long-term episodic memories. *Learning & Memory*, 14(12):861–868.
- 762 Pedraza, L. K., Sierra, R. O., Boos, F. Z., Haubrich, J., Quillfeldt, J. A., and de Oliveira Alvares, L. (2016). The dynamic nature  
763 of systems consolidation: Stress during learning as a switch guiding the rate of the hippocampal dependency and  
764 memory quality. *Hippocampus*, 26(3):362–371.
- 765 Pelli, D. G. (1997). The videotoolbox software for visual psychophysics: transforming numbers into movies. *Spatial Vision*.
- 766 Pinheiro, J., Bates, D., and R Core Team (2022). *nlme: Linear and Nonlinear Mixed Effects Models*. R package version 3.1-161.
- 767 Pruessner, J. C., Dedovic, K., Khalili-Mahani, N., Engert, V., Pruessner, M., Buss, C., Renwick, R., Dagher, A., Meaney, M. J.,  
768 and Lupien, S. (2008). Deactivation of the limbic system during acute psychosocial stress: evidence from positron  
769 emission tomography and functional magnetic resonance imaging studies. *Biological psychiatry*, 63(2):234–240.
- 770 Pruessner, J. C., Köhler, S., Crane, J., Pruessner, M., Lord, C., Byrne, A., Kabani, N., Collins, D. L., and Evans, A. C. (2002).  
771 Volumetry of temporopolar, perirhinal, entorhinal and parahippocampal cortex from high-resolution mr images: con-  
772 sidering the variability of the collateral sulcus. *Cerebral Cortex*, 12(12):1342–1353.
- 773 Qin, S., Hermans, E. J., Van Marle, H. J., and Fernández, G. (2012). Understanding low reliability of memories for neutral  
774 information encoded under stress: alterations in memory-related activation in the hippocampus and midbrain. *Journal*  
775 *of Neuroscience*, 32(12):4032–4041.
- 776 Rey, M., Carlier, E., Talmi, M., and Soumireu-Mourat, B. (1994). Corticosterone effects on long-term potentiation in mouse  
777 hippocampal slices. *Neuroendocrinology*, 60(1):36–41.
- 778 Roozendaal, B., McEwen, B. S., and Chattarji, S. (2009). Stress, memory and the amygdala. *Nature Reviews Neuroscience*,  
779 10(6):423–433.
- 780 Roozendaal, B. and McGaugh, J. L. (1997). Basolateral amygdala lesions block the memory-enhancing effect of glucocor-  
781 ticoid administration in the dorsal hippocampus of rats. *European Journal of Neuroscience*, 9(1):76–83.
- 782 Roozendaal, B., Okuda, S., Van der Zee, E. A., and McGaugh, J. L. (2006). Glucocorticoid enhancement of memory requires  
783 arousal-induced noradrenergic activation in the basolateral amygdala. *Proceedings of the National Academy of Sciences*,  
784 103(17):6741–6746.
- 785 Sandi, C. and Pinelo-Nava, M. T. (2007). Stress and memory: behavioral effects and neurobiological mechanisms. *Neural*  
786 *plasticity*, 2007.
- 787 Schapiro, A. C., Turk-Browne, N. B., Botvinick, M. M., and Norman, K. A. (2017). Complementary learning systems within  
788 the hippocampus: a neural network modelling approach to reconciling episodic memory with statistical learning. *Philo-*  
789 *sophical Transactions of the Royal Society B: Biological Sciences*, 372(1711):20160049.
- 790 Schwabe, L., Bohringer, A., Chatterjee, M., and Schachinger, H. (2008). Effects of pre-learning stress on memory for  
791 neutral, positive and negative words: Different roles of cortisol and autonomic arousal. *Neurobiology of learning and*  
792 *memory*, 90(1):44–53.
- 793 Schwabe, L., Hermans, E. J., Joëls, M., and Roozendaal, B. (2022). Mechanisms of memory under stress. *Neuron*.
- 794 Seckl, J. R., Dickson, K. L., Yates, C., and Fink, G. (1991). Distribution of glucocorticoid and mineralocorticoid receptor  
795 messenger rna expression in human postmortem hippocampus. *Brain Research*, 561(2):332–337.

- 796 Segal, M., Richter-Levin, G., and Maggio, N. (2010). Stress-induced dynamic routing of hippocampal connectivity: A hypothesis.  
797
- 798 Segal, S., Simon, R., McFarlin, S., Alkire, M., Desai, A., and Cahill, L. (2014). Glucocorticoids interact with noradrenergic  
799 activation at encoding to enhance long-term memory for emotional material in women. *Neuroscience*, 277:267–272.
- 800 Sharvit, A., Segal, M., Kehat, O., Stork, O., and Richter-Levin, G. (2015). Differential modulation of synaptic plasticity and  
801 local circuit activity in the dentate gyrus and ca1 regions of the rat hippocampus by corticosterone. *Stress*, 18(3):319–  
802 327.
- 803 Shields, G. S., Hunter, C. L., and Yonelinas, A. P. (2022). Stress and memory encoding: What are the roles of the stress-  
804 encoding delay and stress relevance? *Learning & Memory*, 29(2):48–54.
- 805 Shields, G. S., Sazma, M. A., McCullough, A. M., and Yonelinas, A. P. (2017). The effects of acute stress on episodic memory:  
806 A meta-analysis and integrative review. *Psychological bulletin*, 143(6):636.
- 807 Shors, T. J. (2006). Stressful experience and learning across the lifespan. *Annual review of psychology*, 57:55.
- 808 Sinha, R., Fogelman, N., Wemm, S., Angarita, G., Seo, D., and Hermes, G. (2022). Alcohol withdrawal symptoms predict cor-  
809 ticostriatal dysfunction that is reversed by prazosin treatment in alcohol use disorder. *Addiction Biology*, 27(2):e13116.
- 810 Sinha, R., Lacadie, C. M., Constable, R. T., and Seo, D. (2016). Dynamic neural activity during stress signals resilient coping.  
811 *Proceedings of the National Academy of Sciences*, 113(31):8837–8842.
- 812 Smeets, T., Giesbrecht, T., Jelicic, M., and Merckelbach, H. (2007). Context-dependent enhancement of declarative mem-  
813 ory performance following acute psychosocial stress. *Biological psychology*, 76(1-2):116–123.
- 814 Smith, S. M. (2002). Fast robust automated brain extraction. *Human brain mapping*, 17(3):143–155.
- 815 Stepan, J., Dine, J., Fenzl, T., Polta, S. A., von Wolff, G., Wotjak, C. T., and Eder, M. (2012). Entorhinal theta-frequency input  
816 to the dentate gyrus trisynaptically evokes hippocampal ca1 ltp. *Frontiers in neural circuits*, 6:64.
- 817 Symonds, C. S., McKie, S., Elliott, R., Deakin, J. F. W., and Anderson, I. M. (2012). Detection of the acute effects of hydro-  
818 cortisone in the hippocampus using pharmacological fmri. *European Neuropsychopharmacology*, 22(12):867–874.
- 819 Tambini, A., Rimmele, U., Phelps, E. A., and Davachi, L. (2017). Emotional brain states carry over and enhance future  
820 memory formation. *Nature neuroscience*, 20(2):271–278.
- 821 Tompary, A. and Davachi, L. (2017). Consolidation promotes the emergence of representational overlap in the hippocam-  
822 pus and medial prefrontal cortex. *Neuron*, 96(1):228–241.
- 823 Ulrich-Lai, Y. M. and Herman, J. P. (2009). Neural regulation of endocrine and autonomic stress responses. *Nature reviews*  
824 *neuroscience*, 10(6):397–409.
- 825 Vaisvaser, S., Lin, T., Admon, R., Podlipsky, I., Greenman, Y., Stern, N., Fruchter, E., Wald, I., Pine, D. S., Tarrasch, R.,  
826 et al. (2013). Neural traces of stress: cortisol related sustained enhancement of amygdala-hippocampal functional  
827 connectivity. *Frontiers in human neuroscience*, 7:313.
- 828 van Ast, V. A., Cornelisse, S., Meeter, M., and Kindt, M. (2014). Cortisol mediates the effects of stress on the contextual  
829 dependency of memories. *Psychoneuroendocrinology*, 41:97–110.
- 830 Van Der Linden, L., Mathôt, S., and Vitu, F. (2015). The role of object affordances and center of gravity in eye movements  
831 toward isolated daily-life objects. *Journal of Vision*, 15(5):8–8.
- 832 van Stegeren, A. H. (2009). Imaging stress effects on memory: a review of neuroimaging studies. *The Canadian Journal of*  
833 *Psychiatry*, 54(1):16–27.
- 834 Vandael, D., Wierda, K., Vints, K., Baatsen, P., De Groef, L., Moons, L., Rybakin, V., and Gounko, N. V. (2021). Corticotropin-  
835 releasing factor induces functional and structural synaptic remodelling in acute stress. *Translational Psychiatry*, 11(1):1–  
836 12.
- 837 Visser, R. M., Scholte, H. S., Beemsterboer, T., and Kindt, M. (2013). Neural pattern similarity predicts long-term fear  
838 memory. *Nature neuroscience*, 16(4):388–390.
- 839 Wammes, J., Norman, K. A., and Turk-Browne, N. (2022). Increasing stimulus similarity drives nonmonotonic representa-  
840 tional change in hippocampus. *ELife*, 11.

- 841 Wang, Q., Van Heerikhuizen, J., Aronica, E., Kawata, M., Seress, L., Joels, M., Swaab, D. F., and Lucassen, P. J. (2013). Glucocor-  
842 ticoid receptor protein expression in human hippocampus; stability with age. *Neurobiology of Aging*, 34(6):1662–1673.
- 843 Wang, Z., Neylan, T. C., Mueller, S. G., Lenoci, M., Truran, D., Marmar, C. R., Weiner, M. W., and Schuff, N. (2010). Magnetic  
844 resonance imaging of hippocampal subfields in posttraumatic stress disorder. *Archives of general psychiatry*, 67(3):296–  
845 303.
- 846 Wanjia, G., Favila, S. E., Kim, G., Molitor, R. J., and Kuhl, B. A. (2021). Abrupt hippocampal remapping signals resolution of  
847 memory interference. *Nature communications*, 12(1):1–11.
- 848 Watson, D., Clark, L. A., and Tellegen, A. (1988). Development and validation of brief measures of positive and negative  
849 affect: the panas scales. *Journal of personality and social psychology*, 54(6):1063.
- 850 Weis, C. N., Webb, E. K., Huggins, A. A., Kallenbach, M., Miskovich, T. A., Fitzgerald, J. M., Bennett, K. P., Krukowski, J. L.,  
851 deRoos Cassini, T. A., and Larson, C. L. (2021). Stability of hippocampal subfield volumes after trauma and relationship  
852 to development of ptsd symptoms. *NeuroImage*, 236:118076.
- 853 Wiegert, O., Joëls, M., and Krugers, H. (2006). Timing is essential for rapid effects of corticosterone on synaptic potentiation  
854 in the mouse hippocampus. *Learning & Memory*, 13(2):110–113.
- 855 Woolrich, M. W., Ripley, B. D., Brady, M., and Smith, S. M. (2001). Temporal autocorrelation in univariate linear modeling  
856 of fmri data. *Neuroimage*, 14(6):1370–1386.
- 857 Xiao, J., Hays, J., Ehinger, K. A., Oliva, A., and Torralba, A. (2010). Sun database: Large-scale scene recognition from abbey  
858 to zoo. In *2010 IEEE computer society conference on computer vision and pattern recognition*, pages 3485–3492. IEEE.
- 859 Yushkevich, P. A., Pluta, J. B., Wang, H., Xie, L., Ding, S.-L., Gertje, E. C., Mancuso, L., Klot, D., Das, S. R., and Wolk, D. A.  
860 (2015). Automated volumetry and regional thickness analysis of hippocampal subfields and medial temporal cortical  
861 structures in mild cognitive impairment. *Human brain mapping*, 36(1):258–287.
- 862 Zoladz, P. R., Clark, B., Warnecke, A., Smith, L., Tabar, J., and Talbot, J. N. (2011). Pre-learning stress differentially affects  
863 long-term memory for emotional words, depending on temporal proximity to the learning experience. *Physiology &  
864 behavior*, 103(5):467–476.
